# Supplementary material for: Ketoprofen-Based Polymer-Drug Nanoparticles Provide Anti-Inflammatory Properties to HA/Collagen Hydrogels
Source: MDPI journal article supplement (doi:10.3390/jfb14030160), 2023-03-17
Supplement: s1 [file s1]

# Supplementary Materials: Ketoprofen-Based Polymer-Drug Nanoparticles Provide Anti-Inflammatory Properties to HA/Collagen Hydrogels

Norbert Halfter <sup>1,†</sup>, Eva Espinosa-Cano <sup>2,3,†</sup>, Gloria María Pontes-Quero <sup>2,3</sup>, Rosa Ana Ramírez-Jiménez <sup>2,3</sup>, Christiane Heinemann <sup>1</sup>, Stephanie Möller <sup>4</sup>, Matthias Schnabelrauch <sup>4</sup>, Hans-Peter Wiesmann <sup>1</sup>, Vera Hintze <sup>1,\*</sup> and Maria Rosa Aguilar <sup>2,3,\*</sup>

<sup>1</sup> Institute of Materials Science, Max Bergmann Center of Biomaterials, Technische Universität Dresden, Budapester Straße 27, 01069 Dresden, Germany

<sup>2</sup> Group of Biomaterials, Institute of Polymer Science and Technology ICTP-CSIC, C/Juan de la Cierva 3, 28006 Madrid, Spain

<sup>3</sup> CIBER de Bioingeniería, Biomateriales y Nanomedicina, Instituto de Salud Carlos III, C/Monforte de Lemos 3/5, 28029 Madrid, Spain

<sup>4</sup> Biomaterials Department, INNOVENT e.V, Prüssingstraße 27B, 07745 Jena, Germany

\* Correspondence: vera.hintze@tu-dresden.de (V.H.); mraguilar@ictp.csic.es (M.R.A.)

† These authors contributed equally to this work.

**Table S1.** Used volumes for gel loading with NP for cell experiments and determination of properties.  $V_{NP}$  and  $V_{acetic\ acid}$  were mixed before incubation of the gels.

| Label          | c HA-MAC [mg/mL] <sup>1</sup> | c coll [mg/mL] <sup>1</sup> | Gel type | V of 1 mg/mL NP per HG [μL] <sup>2</sup> | V of 0.1 M Acetic acid [μL] |
|----------------|-------------------------------|-----------------------------|----------|------------------------------------------|-----------------------------|
| 10HA 40NP      | 10                            | 0.5                         | HG       | 65                                       | 185                         |
| 10HA 120NP     | 10                            | 0.5                         | HG       | 195                                      | 55                          |
| CL-10HA 40NP   | 10                            | 0.5                         | HG       | 40 <sup>o)</sup>                         | -                           |
| 30HA 40NP      | 30                            | 0.5                         | HG       | 119                                      | 131                         |
| cryo 10HA 40NP | 10                            | 0.5                         | CG       | 41                                       | 209                         |

<sup>1</sup> before the addition of LAP; <sup>2</sup> calculation was based on the first experiments of the release experiments for 1 d.

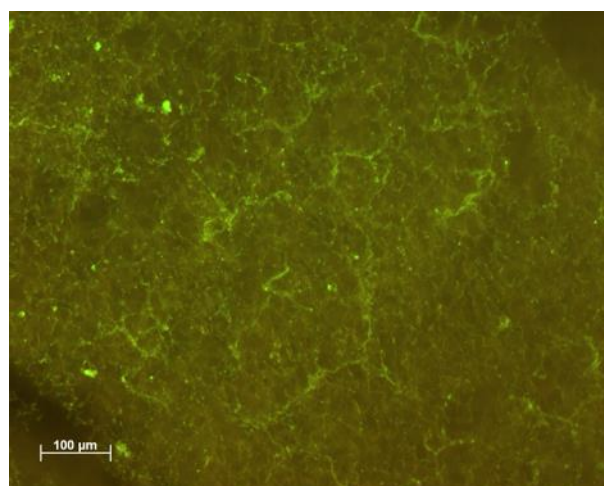

**Figure S1.** Fluorescence image of cryo 10HA 40NP after extraction with EtOH.

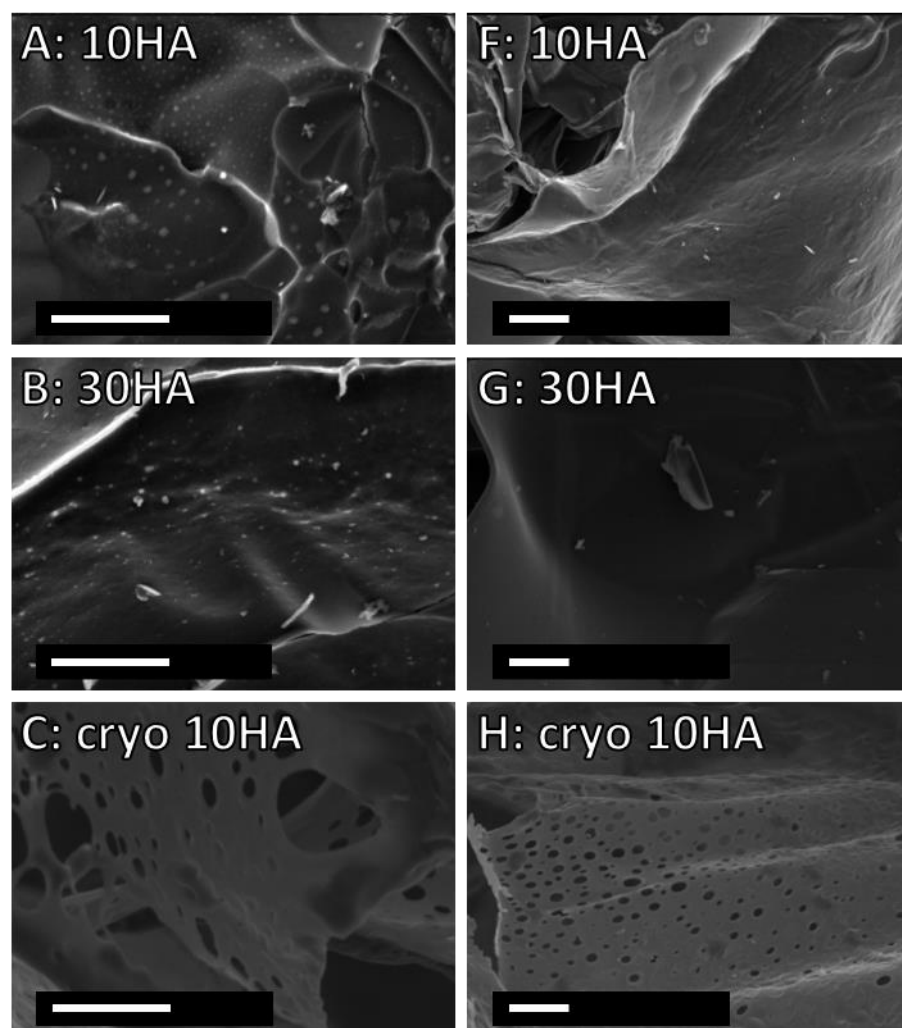

**Figure S2.** Top view (A-C, magnification: 40,000x) and cross-section (D-F, magnification: 20,000x) of freeze-dried gels without NP. Scale bar = 2 μm.

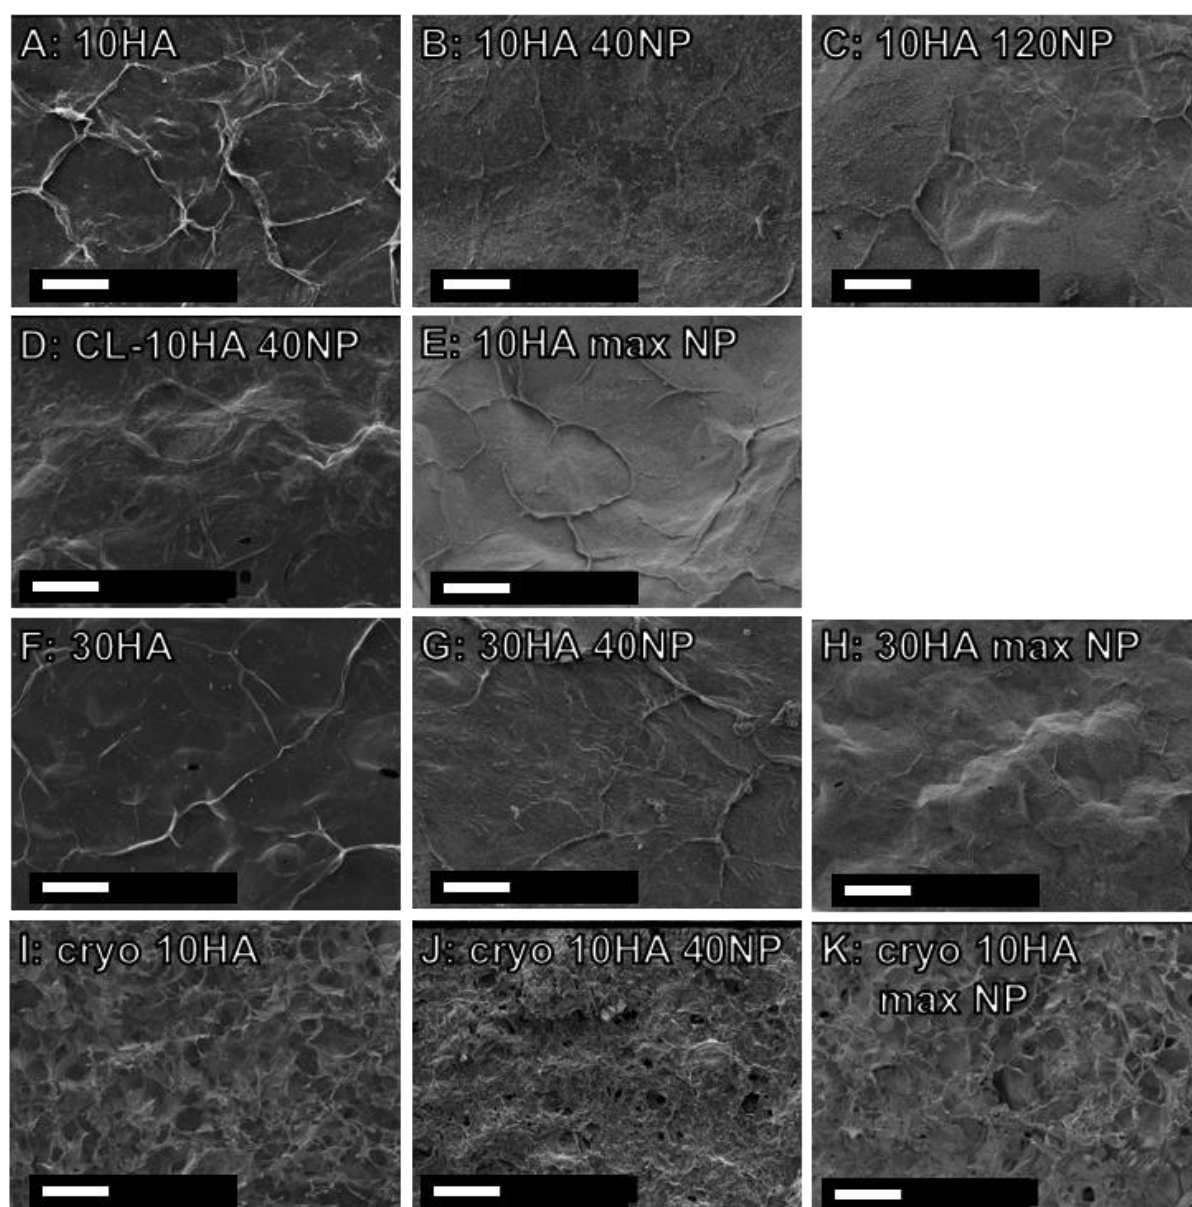

**Figure S3.** Top view of freeze-dried gels. Scale bar 50  $\mu$ M. Magnification for all images was 1000x.

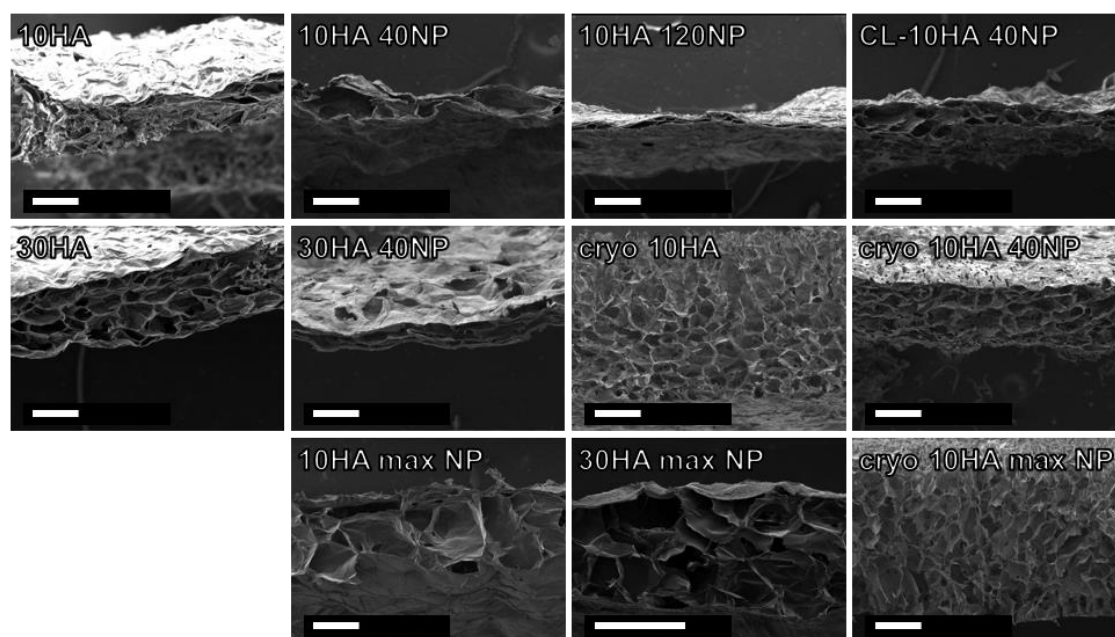

**Figure S4.** Cross-section of freeze-dried gels. Scale bar 100  $\mu$ m (magnification: 500x, except 30HA max NP, there magnification is 1000x).

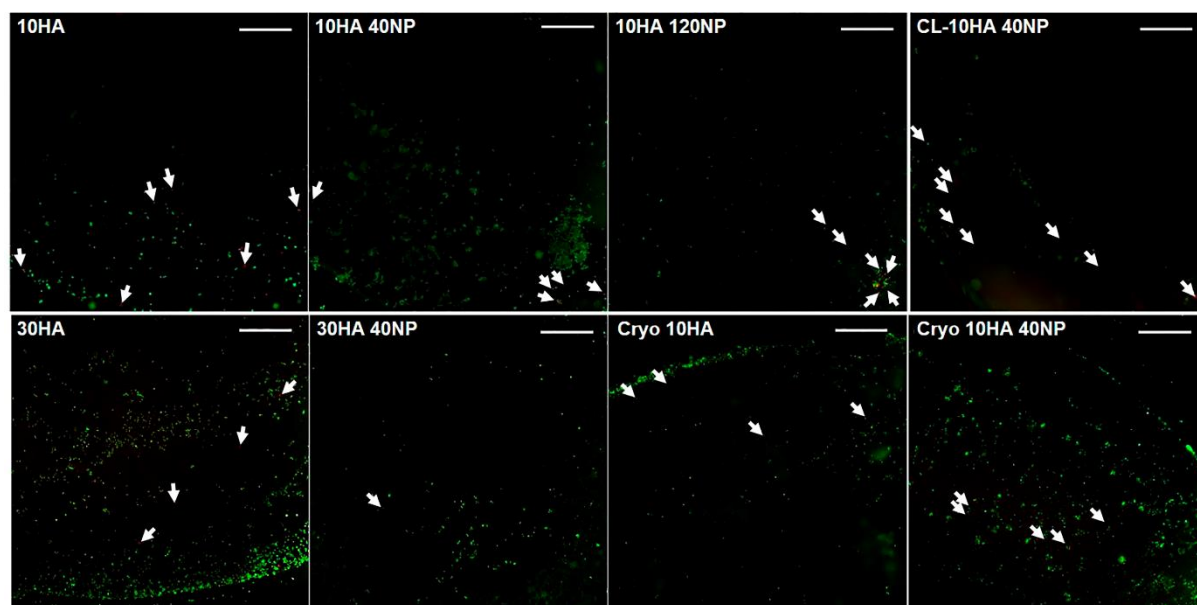

**Figure S5.** Cell viability. Representative fluorescent images of RAW264.7 stained with Calcein AM (living cells in green) and ethidium homodimer (dead cells in red and indicated with arrows) after 48 h using the Live/Dead™ assay. Scale: 1 mm.

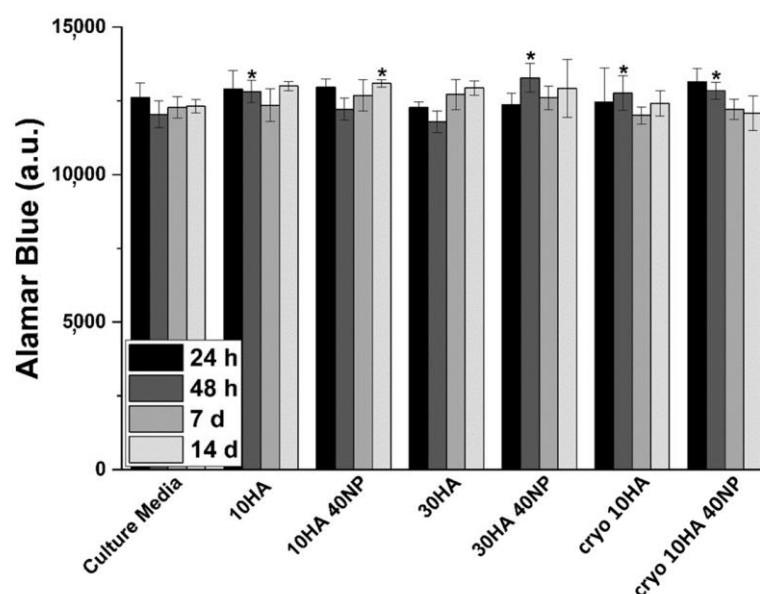

**Figure S6.** Effect of gel extracts on cell proliferation using an AlamarBlue® assay. Data are represented as mean  $\pm$  SD values. ANOVA between cells treated with gel extracts and culture media controls was performed at each time point (\* $p < 0.05$ ).

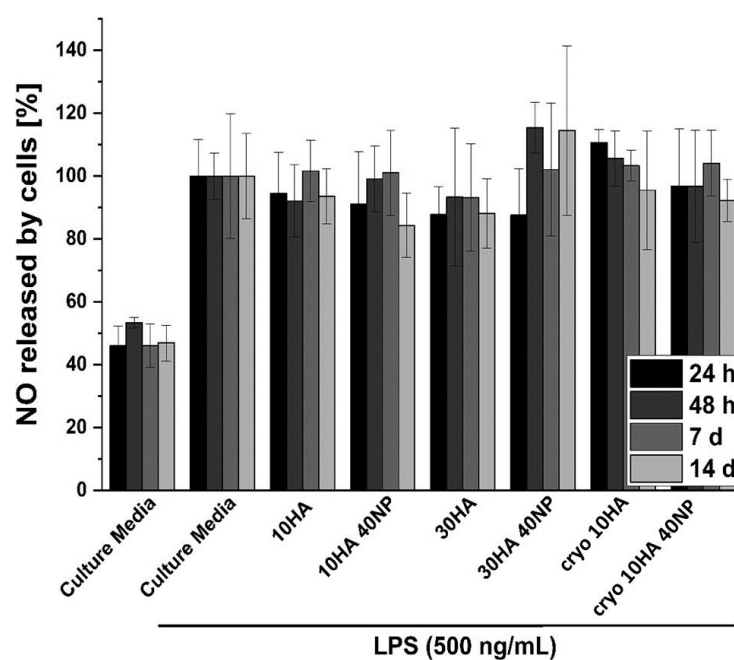

**Figure S7.** Effect of gel extracts on NO production in LPS-stimulated RAW264.7. Mean  $\pm$  SD values are relative to control LPS-stimulated culture media cells, in which NO production was taken as 100%. ANOVA between cells treated with gel extracts and culture media controls was performed at each time point (\* $p < 0.05$ ).
